# Supplementary material for: Genetic Differentiation and Demographic History of Three Cerris Oak Species in China Based on Nuclear Microsatellite Makers
Source: MDPI journal article supplement (doi:10.3390/f12091164), 2021-08-27
Supplement: s1 [file s1]

## **Supporting information**

### **Supporting Tables (nine Tables, Tables S1–11)**

### **Supporting figures (ten Figures, Figures S1–10)**

#### **Supporting Tables**

Table S1. Genetic diversity of 44 populations of three *Qerris* oaks (*Q. variabilis*, *Q. acutissima* and *Q. chenii*) estimated based on 16 microsatellite loci.

Table S2. Primer sequences and characterization of the 16 microsatellite loci used in this study

Table S3. Prior distributions for model parameters used in divergence model comparisons

Table S4. Posterior probability under logistic and descriptions of four scenarios, and prior setting for all parameters used in approximate Bayesian computation (ABC) for demographic analysis of three species (Fig. 3b)

Table S5. 14 bioclimatic variables that were used in Ecological niche modeling

Table S6. Diversity indices of 16 EST-SSR loci for 759 individuals

Table S7. Diversity indices of 16 EST-SSR loci for three related species

Table S8 Hardy-Weinberg equilibrium (HWE) test in this study

Table S9. Estimation of rates of contemporary gene flow per generation among three species (QV, QA and QC) using the programs BAYESASS v3.0

Table S10. Posterior probability of each scenario and 95% confidence intervals (CI) based on the logistic regression approach for approximate Bayesian computation analyses (ABC) for all three related species (*Q. acutissima*, *Q. variabilis* and *Q. chenii*). Type I and type II errors for the best supported scenario (in bold) are indicated

Table S11. Indices of bottleneck test of the three related species

## Supporting figures

Figure S1. Bayesian inference analysis of 16 EST-SSR data determining the most likely number of clusters ( $K$ ) for three *Cerris* oaks (*Q. variabilis*, *Q. acutissima* and *Q. chenii*). The distribution of the likelihood  $L(K)$  values (a) and Delta $K$  values (b) are presented for  $K = 1-8$  (10 replicates).

Figure S2. Bayesian inference analysis of nuclear data for *Q. variabilis* and *Q. acutissima* separately, STRUCTURE plots are presented for  $K = 2$ .

Figure S3. Comparison of posterior probabilities for four simulated scenarios of species differentiation obtained by logistic regression from 1 % of the closest data set in DIYABC.

Figure S4. Principal component analysis results obtained along the first three axes for the pre-evaluate models and prior distributions of three oak species divergence in DIYABC.

Figure S5. Model checking in DIYABC for the best-supported (species divergence: model 2).

Figure S6. Principal component analysis results obtained along the first three axes for the pre-evaluate models and prior distributions of three oak species demographic models in DIYABC. (a), (b) and (c) representing the species of *Q. variabilis*, *Q. acutissima*, and *Q. chenii*, respectively.

Figure S7. Model checking in DIYABC for the best-supported demographic models.

Figure S8. Predicted distributions of *Q. variabilis* (a, d, j), *Q. chenii* (b, e, h) and *Q. acutissima* (c, f, i) based on ecological niche modelling using Maxent. Predicted distributions are shown for the present time (a, b, c), LGM (d, e, f), and LIG distribution (g, h, i). The results of identity tests (j-l). Bar indicate the null distributions of  $D$  and  $I$ . Both are generated from 100 randomizations. x-axis indicates values of  $I$  and  $D$  and y-axis indicates number of randomizations. Red and green solid line indicates values in actual Maxent runs.

Figure S9. (A) Standard principal component analysis (PCA) performed with climatic values for three *Cerris* oaks populations. (B) Climatic space constructed over all background areas and actual niches of all populations in this study, where the solid line represents an occurrence density of 20%, and (C) an occurrence density of 100% is denoted by the thin line and 100% of available climatic background by the thick line.

Figure S10. Contribution of each environmental variable to spatial distribution of the PCA-env

**Table S1.** Genetic diversity of 44 populations of three *Cerris* oaks (*Q. variabilis*, *Q. acutissima* and *Q. chenii*) estimated based on 16 microsatellite loci.

| ID                   | Location           | Longitude<br>(°E) | Latitude<br>(°N) | <i>N</i> | <i>N<sub>a</sub></i> | <i>N<sub>e</sub></i> | <i>I</i> | <i>H<sub>O</sub></i> | <i>H<sub>E</sub></i> | <i>F<sub>IS</sub></i> |
|----------------------|--------------------|-------------------|------------------|----------|----------------------|----------------------|----------|----------------------|----------------------|-----------------------|
| <i>Q. variabilis</i> |                    |                   |                  |          |                      |                      |          |                      |                      |                       |
| SPX                  | Yunnan, Wenshan    | 105.63            | 23.63            | 20       | 5.188                | 3.680                | 1.285    | 0.143                | 0.630                | 0.783                 |
| SPY                  | Yunnan, Kunming    | 102.66            | 25.04            | 20       | 4.813                | 3.080                | 1.130    | 0.127                | 0.574                | 0.789                 |
| SPW                  | Guizhou, Qianxinan | 105.44            | 25.1             | 20       | 4.938                | 3.074                | 1.167    | 0.116                | 0.585                | 0.811                 |
| SPU                  | Guangxi, Baise     | 106.23            | 24.29            | 20       | 5.125                | 3.515                | 1.253    | 0.224                | 0.622                | 0.655                 |
| SPE                  | Jiangxi, Shangrao  | 117.99            | 28.44            | 17       | 3.938                | 2.386                | 0.968    | 0.125                | 0.514                | 0.771                 |
| SPg                  | Gansu, Longnan     | 105.69            | 33.69            | 20       | 4.688                | 2.916                | 1.160    | 0.186                | 0.598                | 0.702                 |
| SPC                  | Shandong, Linyi    | 117.98            | 35.56            | 20       | 4.688                | 2.974                | 1.088    | 0.153                | 0.542                | 0.729                 |
| SPS                  | Anhui, Hefei       | 117.18            | 31.84            | 10       | 3.875                | 2.758                | 1.023    | 0.139                | 0.535                | 0.764                 |
| SPI                  | Hubei, Xiangyang   | 112.03            | 31.99            | 20       | 5.063                | 3.091                | 1.184    | 0.169                | 0.590                | 0.726                 |
| SPF                  | Hunan, Changsha    | 112.94            | 28.19            | 10       | 3.375                | 2.617                | 0.964    | 0.112                | 0.535                | 0.811                 |
| SPM                  | Jiangsu, Changshu  | 120.78            | 31.63            | 17       | 4.375                | 2.906                | 1.116    | 0.174                | 0.577                | 0.714                 |
| SPR                  | Henan, Zhumadian   | 113.73            | 32.79            | 15       | 5.063                | 3.028                | 1.237    | 0.128                | 0.617                | 0.806                 |
| SPA                  | Henan, Dengfeng    | 113               | 34.52            | 20       | 4.750                | 3.172                | 1.132    | 0.111                | 0.565                | 0.813                 |
| SPJ                  | Jiangxi, Jiujiang  | 115.59            | 29.09            | 20       | 4.688                | 2.981                | 1.141    | 0.139                | 0.581                | 0.771                 |
| SPV                  | Yunnan, Dali       | 100.27            | 25.61            | 20       | 4.063                | 2.685                | 1.034    | 0.123                | 0.550                | 0.786                 |
| SPH                  | Shaanxi, Shangluo  | 109.89            | 33.53            | 11       | 4.188                | 3.053                | 1.123    | 0.097                | 0.588                | 0.850                 |
| SPLD                 | Sichuan, Ganzhi    | 102.22            | 29.89            | 20       | 4.188                | 2.767                | 1.007    | 0.154                | 0.515                | 0.713                 |
| SPWS                 | Chongqing, Wushan  | 110.08            | 31.28            | 17       | 4.625                | 3.071                | 1.152    | 0.19                 | 0.588                | 0.694                 |
| SPc                  | Hubei, Yichang     | 111.29            | 30.69            | 19       | 4.563                | 3.244                | 1.149    | 0.162                | 0.585                | 0.736                 |
| Mean                 |                    |                   |                  |          | 4.536                | 3.000                | 1.122    | 0.146                | 0.573                |                       |
| <i>Q. acutissima</i> |                    |                   |                  |          |                      |                      |          |                      |                      |                       |
| A                    | Yunnan, Wenshan    | 105.63            | 23.63            | 10       | 2.500                | 1.671                | 0.557    | 0.106                | 0.318                | 0.695                 |
| B                    | Yunnan, Kunming    | 102.66            | 25.04            | 20       | 3.688                | 2.049                | 0.758    | 0.163                | 0.392                | 0.602                 |
| C                    | Guizhou, Qianxinan | 105.44            | 25.1             | 20       | 4.313                | 2.629                | 0.918    | 0.244                | 0.458                | 0.487                 |
| E                    | Guangxi, Baise     | 106.23            | 24.29            | 20       | 4.125                | 2.400                | 0.917    | 0.242                | 0.476                | 0.511                 |
| SR                   | Jiangxi, Shangrao  | 117.99            | 28.44            | 13       | 4.000                | 2.465                | 0.966    | 0.203                | 0.502                | 0.622                 |
| J                    | Gansu, Longnan     | 105.69            | 33.69            | 20       | 3.813                | 2.768                | 0.937    | 0.241                | 0.488                | 0.526                 |
| LY                   | Shandong, Linyi    | 117.98            | 35.56            | 20       | 4.250                | 2.529                | 0.934    | 0.204                | 0.472                | 0.585                 |

|                  |                     |        |       |    |       |       |       |       |       |       |
|------------------|---------------------|--------|-------|----|-------|-------|-------|-------|-------|-------|
| HF               | Anhui, Hefei        | 117.18 | 31.84 | 20 | 4.188 | 2.707 | 0.977 | 0.214 | 0.507 | 0.596 |
| XY               | Hubei, Xiangyang    | 112.03 | 31.99 | 20 | 4.250 | 2.584 | 0.978 | 0.189 | 0.509 | 0.645 |
| CS               | Hunan, Changsha     | 112.94 | 28.19 | 10 | 3.125 | 2.375 | 0.825 | 0.2   | 0.453 | 0.596 |
| CY               | Jiangsu, Changshu   | 120.78 | 31.63 | 6  | 2.938 | 2.525 | 0.866 | 0.302 | 0.501 | 0.471 |
| QS               | Henan, Zhumadian    | 113.73 | 32.79 | 20 | 3.875 | 2.473 | 0.849 | 0.198 | 0.455 | 0.584 |
| P                | Sichuan, Meishan    | 113    | 34.52 | 10 | 4.188 | 2.704 | 0.992 | 0.259 | 0.521 | 0.526 |
| T                | Shandong, Jinan     | 115.59 | 29.09 | 20 | 3.688 | 2.268 | 0.862 | 0.224 | 0.462 | 0.533 |
| U                | Anhui, Huaibei      | 100.27 | 25.61 | 20 | 3.813 | 2.225 | 0.845 | 0.232 | 0.449 | 0.502 |
| YS               | Guangxi, Guilin     | 109.89 | 33.53 | 10 | 3.875 | 2.979 | 1.005 | 0.231 | 0.518 | 0.589 |
| YK               | Zhejiang, Yongkang  | 102.22 | 29.89 | 20 | 5.625 | 3.372 | 1.259 | 0.222 | 0.593 | 0.641 |
| PS               | Guangdong, Shaoguan | 110.08 | 31.28 | 10 | 4.313 | 2.410 | 0.996 | 0.36  | 0.520 | 0.331 |
| H                | Yunnan, Jinghong    | 111.29 | 30.69 | 17 | 2.688 | 1.910 | 0.661 | 0.081 | 0.385 | 0.801 |
| L                | Beijing, Miyun      | 105.63 | 23.63 | 10 | 3.688 | 2.322 | 0.892 | 0.197 | 0.490 | 0.614 |
| Mean             |                     |        |       |    | 3.847 | 2.468 | 0.900 | 0.216 | 0.474 |       |
| <i>Q. chenii</i> |                     |        |       |    |       |       |       |       |       |       |
| XA               | Jiangxi, Lushan     | 115.98 | 29.6  | 20 | 6.063 | 3.831 | 3.334 | 0.284 | 0.627 | 0.564 |
| XB               | Hunan, Xinning      | 111.1  | 26.75 | 14 | 5.438 | 3.699 | 1.279 | 0.27  | 0.609 | 0.583 |
| XC               | Anhui, Hefei        | 117.17 | 31.84 | 20 | 5.063 | 3.255 | 1.209 | 0.274 | 0.600 | 0.562 |
| XD               | Anhui, Taihu        | 117.13 | 30.47 | 14 | 4.438 | 3.045 | 1.116 | 0.295 | 0.573 | 0.507 |
| XE               | Anhui, Yuexi        | 116.46 | 30.72 | 17 | 5.000 | 3.543 | 1.204 | 0.313 | 0.583 | 0.488 |
| Mean             |                     |        |       |    | 5.200 | 3.474 | 1.228 | 0.287 | 0.598 |       |

sympatric population;  $N$ , sample size;  $N_a$ , average number of alleles;  $N_e$ , number of effective alleles;  $I$ , Shannon's information index;  $H_o$ , observed heterozygosity;  $H_E$ , expected heterozygosity;  $F_{IS}$ , inbreeding coefficient.

**Table S2.** Primer sequences and characterization of the 16 microsatellite loci used in this study

| Locus name | GenBank NO. | Primer sequences(5'-3')                               | Ta (°C) | Motif               |
|------------|-------------|-------------------------------------------------------|---------|---------------------|
| QV1        | KP855973    | F-AACCTCACAATGAGTGCTCTA<br>R-GAGCTTGGTTGGCTAAAAT      | 55      | (AAC) <sub>7</sub>  |
| QV2        | KP856092    | F-AAGACAAGCACTTGTTTACCA<br>R-CAGCATCAAAGTCTACTAGG     | 55      | (GA) <sub>11</sub>  |
| QV3        | KP855993    | F-TATCTTTTGTGGGGGAAGATA<br>R-AGAAGGCCTCATCTTTCTTTA    | 55      | (GA) <sub>13</sub>  |
| QV4        | KP856140    | F- ATTCATTTTCTCCACCAAA<br>R- CCATTATGATTGGATTAGGG     | 55      | (AAT) <sub>8</sub>  |
| QV6        | KP855682    | F- CGCTTGCCACAATAGTAATAA<br>R- AAGTACCAAAAATGACAATG   | 55      | (ATC) <sub>8</sub>  |
| QV7        | KP856122    | F- TGTCTTCTCTTGTCATTTCTCA<br>R- TGAGTTGTTACTCCATTTGGT | 55      | (TCT) <sub>12</sub> |
| QV8        | KP855892    | F- CCTGCTTCCAATATTCTCATA<br>R- GCAAAATCACTCATCAAGAAC  | 55      | (TTC) <sub>6</sub>  |
| QV9        | KP855677    | F- CCCTAAAATTTCAATCAATC<br>R- TTTATGCTCATTCCTCTTGAA   | 55      | (AG) <sub>13</sub>  |
| QV10       | KP856035    | F- TGCCTTATTGTTGATGCTG<br>R- CAAAATCCAAAAGGCCAAAC     | 55      | (GA) <sub>14</sub>  |
| QV11       | KP856152    | F- ACCAATGTGAAAAGGGAAG<br>R- TGGGTTTGGTTTCTTCTTCT     | 55      | (AAG) <sub>6</sub>  |
| QV12       | KP856046    | F- CAGCTCTGGATGGATATAATG<br>R- ACATGCATGGAGAGAAATAGA  | 55      | (TC) <sub>9</sub>   |
| QV13       | KP856153    | F- GTCAAGAAGGAAGCCGTAA<br>R- TCTTTGTCACCCCATCAC       | 55      | (TA) <sub>10</sub>  |
| QV14       | KP856067    | F- AGAGCAATTCCCAACTAACTT<br>R- TAGTTCAAGATCTGAGCCAAA  | 55      | (TC) <sub>10</sub>  |
| QV15       | KP855752    | F- GACCCATTGACTGAACTCAT<br>R- GTGTCTCTGTCCAAAACCTCAA  | 55      | (AG) <sub>17</sub>  |
| QV16       | KP856019    | F- GTCCAAGTAGGTTCTTCATT<br>R- AAAGAAATGGGTCCCAAA      | 55      | (TTC) <sub>7</sub>  |
| QV17       | KP856055    | F- ACGAGAATGACAGGAAAATA<br>R- TGATCGTCGTGGTAATCTTAG   | 55      | (ACA) <sub>7</sub>  |

**Table S3.** Prior distributions for model parameters used in divergence model comparisons

| Parameter                        | Models             |                      |                      |
|----------------------------------|--------------------|----------------------|----------------------|
|                                  | Prior Distribution | Minimum              | Maximum              |
| Effective population size        |                    |                      |                      |
| NA(ancestral population)         | uniform            | 100                  | 1000000              |
| N1                               | uniform            | 100                  | 1000000              |
| N2                               | uniform            | 100                  | 1000000              |
| N3                               | uniform            | 100                  | 1000000              |
| Time of events                   |                    |                      |                      |
| t1                               | uniform            | 5000                 | 200000               |
| t2                               | uniform            | 200000               | 300000               |
| Mean mutation rate               | Gamma              | $1.0 \times 10^{-6}$ | $1.0 \times 10^{-5}$ |
| Individual locus mutation rate   | Gamma              | $1.0 \times 10^{-7}$ | $1.0 \times 10^{-4}$ |
| Mean coefficient $P$             | uniform            | 0.1                  | 0.3                  |
| Individual locus coefficient $P$ | Gamma              | 0.01                 | 0.9                  |

N1, effective population size of *Q. variabilis*; N2, effective population size of *Q. acutissima*; N3, effective population size of *Q. chenii*; NA, effective population size of ancestral population.

**Table S4.** Posterior probability under logistic and descriptions of four scenarios, and prior setting for all parameters used in approximate Bayesian computation (ABC) for demographic analysis of three species (Fig. 3b)

|                          | <i>Q. variabilis</i>           |                                 | <i>Q. acutissima</i>            |                                  | <i>Q. chenii</i>               |                                  |
|--------------------------|--------------------------------|---------------------------------|---------------------------------|----------------------------------|--------------------------------|----------------------------------|
|                          | Posterior Probability [95% CI] |                                 | Posterior Probability [95% CI]  |                                  | Posterior Probability [95% CI] |                                  |
| Scenario1                | 0.1699 [0.1646,0.1752]         |                                 | <b>0.6182 [0.5982,0.6382]</b>   |                                  | 0.3172 [0.3106,0.3237]         |                                  |
| Scenario2                | 0.0991 [0.0946,0.1036]         |                                 | 0.0003 [0.0000,0.0110]          |                                  | 0.1198 [0.1146,0.1251]         |                                  |
| Scenario3                | <b>0.5177 [0.5108,0.5246]</b>  |                                 | 0.0339 [0.0235,0.0443]          |                                  | 0.2308 [0.2249,0.2367]         |                                  |
| Scenario4                | 0.2133 [0.2075,0.2191]         |                                 | 0.3476 [0.3276,0.3675]          |                                  | <b>0.3321 [0.3257,0.3386]</b>  |                                  |
| Best supported scenarios |                                | <b>Scenario 3</b>               |                                 | <b>Scenario 1</b>                |                                | <b>Scenario 4</b>                |
|                          | prior setting                  | Posterior parameter             |                                 | Posterior parameter              |                                | Posterior parameter              |
| NA                       | Uniform [10, 10 <sup>6</sup> ] | 3.14E+05<br>[1.13E+05,7.56E+05] | Uniform [100, 10 <sup>6</sup> ] | 1.74E+05<br>[7.19E+04, 3.88E+05] | Uniform [10, 10 <sup>6</sup> ] | 3.26E+05<br>[1.67E+05,6.64E+05]  |
| N1                       | Uniform [10, 10 <sup>6</sup> ] | 6.74E+05<br>[2.18E+05,9.86E+05] | Uniform [100, 10 <sup>6</sup> ] | 8.84E+05<br>[9.10E+05, 9.96E+05] | Uniform [10, 10 <sup>6</sup> ] | 5.72E+05<br>[2.71E+05,9.15E+05]  |
| N2                       | Uniform [10, 10 <sup>6</sup> ] | -                               | Uniform [100, 10 <sup>6</sup> ] | 5.94E+05<br>[2.65E+05, 9.23E+05] | Uniform [10, 10 <sup>6</sup> ] | -                                |
| N3                       | Uniform [10, 10 <sup>6</sup> ] | -                               | Uniform [100, 10 <sup>6</sup> ] | -                                | Uniform [10, 10 <sup>6</sup> ] | -                                |
| N4                       | Uniform [10, 10 <sup>6</sup> ] | 5.39E+04<br>[6.79E+03,3.66E+05] | Uniform [100, 10 <sup>6</sup> ] | -                                | Uniform [10, 10 <sup>6</sup> ] | -                                |
| N5                       | Uniform [10, 10 <sup>6</sup> ] | -                               | Uniform [100, 10 <sup>6</sup> ] | -                                | Uniform [10, 10 <sup>6</sup> ] | 8.27E+05<br>[4.38E+05, 9.93E+05] |
| N6                       | Uniform [10, 10 <sup>6</sup> ] | -                               | Uniform [100, 10 <sup>6</sup> ] | -                                | Uniform [10, 10 <sup>6</sup> ] | -                                |
| t1                       | Uniform [10,10000]             | 2.32E+03<br>[1.67E+02,9.02E+03] | Uniform [10,10000]              | 5.25E+03<br>[4.12E+02, 9.36E+03] | Uniform [10, 3000]             | 1.25E+03<br>[6.53E+01, 2.88E+03] |

|                                     |                             |                                 |                               |                                 |                               |                                 |
|-------------------------------------|-----------------------------|---------------------------------|-------------------------------|---------------------------------|-------------------------------|---------------------------------|
| t2                                  | Uniform [10, 18000]         | 1.19E+04<br>[2.89E+03,1.77E+04] | Uniform [10, 10000]           | 8.21E+03<br>[4.09E+03,9.95E+03] | Uniform [10, 6000]            | 4.02E+03<br>[9.84E+02,5.90E+03] |
| Mean mutation rate                  | Gamma<br>[1.0E-06, 5.0E-06] |                                 | Gamma<br>[1.0E-06, 5.0E-06]   |                                 | Gamma<br>[1.0E-06, 5.0E-06]   |                                 |
| Individual locus<br>mutation rate   | Gamma<br>[1.0E-07, 5.0E-04] |                                 | Gamma<br>[1.0E-07, 1.0E-04]   |                                 | Gamma<br>[1.0E-07, 5.0E-04]   |                                 |
| Mean coefficient $P$                | Uniform [1.0E-01,3.0E-01]   |                                 | Uniform<br>[1.0E-01, 3.0E-01] |                                 | Uniform<br>[1.0E-01, 3.0E-01] |                                 |
| Individual locus<br>coefficient $P$ | Gamma<br>[1.0E-02, 9.0E-01] |                                 | Gamma<br>[1.0E-02, 9.0E-01]   |                                 | Gamma<br>[1.0E-02, 9.0E-01]   |                                 |

**Table S5.** 14 bioclimatic variables that were used in Ecological niche modeling

| Code  | Bioclimatic variable                                       |
|-------|------------------------------------------------------------|
| BIO1  | Annual precipitation                                       |
| BIO2  | Mean Diurnal Range (Mean of monthly (max temp - min temp)) |
| BIO3  | Isothermality                                              |
| BIO4  | Temperature seasonality                                    |
| BIO5  | Max Temperature of Warmest Month                           |
| BIO8  | Temperature seasonality                                    |
| BIO9  | Mean temperature of the driest quarter                     |
| BIO10 | Mean temperature of the warmest quarter                    |
| BIO12 | Annual precipitation                                       |
| BIO13 | Precipitation of the wettest month                         |
| BIO14 | Precipitation of Driest Month                              |
| BIO15 | Precipitation Seasonality (Coefficient of Variation)       |
| BIO17 | Precipitation of the driest quarter                        |
| BIO18 | Precipitation of Warmest Quarter                           |

**Table S6.** Diversity indices of 16 EST-SSR loci for 759 individuals

| <b>Locus</b> | <b><i>N<sub>a</sub></i></b> | <b><i>A<sub>R</sub></i></b> | <b><i>H<sub>O</sub></i></b> | <b><i>H<sub>E</sub></i></b> | <b>PIC</b> | <b><i>H<sub>S</sub></i></b> | <b><i>H<sub>T</sub></i></b> | <b><i>F<sub>ST</sub></i></b> | <b><i>G'_{ST}</i></b> |
|--------------|-----------------------------|-----------------------------|-----------------------------|-----------------------------|------------|-----------------------------|-----------------------------|------------------------------|-----------------------|
| QV1          | 11                          | 5.760                       | 0.381                       | 0.862                       | 0.847      | 0.730                       | 0.832                       | 0.119                        | 0.463                 |
| QV2          | 13                          | 4.915                       | 0.317                       | 0.792                       | 0.773      | 0.415                       | 0.744                       | 0.447                        | 0.763                 |
| QV3          | 17                          | 6.004                       | 0.471                       | 0.850                       | 0.838      | 0.616                       | 0.819                       | 0.260                        | 0.655                 |
| QV4          | 8                           | 3.767                       | 0.267                       | 0.722                       | 0.688      | 0.470                       | 0.661                       | 0.289                        | 0.550                 |
| QV6          | 7                           | 4.050                       | 0.218                       | 0.767                       | 0.737      | 0.308                       | 0.709                       | 0.570                        | 0.823                 |
| QV7          | 9                           | 4.991                       | 0.374                       | 0.834                       | 0.814      | 0.542                       | 0.796                       | 0.322                        | 0.704                 |
| QV8          | 6                           | 3.473                       | 0.369                       | 0.736                       | 0.695      | 0.511                       | 0.669                       | 0.243                        | 0.489                 |
| QV9          | 25                          | 8.557                       | 0.268                       | 0.944                       | 0.940      | 0.822                       | 0.933                       | 0.119                        | 0.682                 |
| QV10         | 14                          | 5.897                       | 0.224                       | 0.843                       | 0.830      | 0.665                       | 0.791                       | 0.154                        | 0.483                 |
| QV11         | 10                          | 3.945                       | 0.236                       | 0.731                       | 0.695      | 0.561                       | 0.676                       | 0.174                        | 0.392                 |
| QV12         | 12                          | 3.980                       | 0.261                       | 0.734                       | 0.698      | 0.524                       | 0.673                       | 0.229                        | 0.470                 |
| QV13         | 10                          | 4.877                       | 0.250                       | 0.785                       | 0.766      | 0.567                       | 0.746                       | 0.252                        | 0.561                 |
| QV14         | 16                          | 6.120                       | 0.362                       | 0.874                       | 0.862      | 0.757                       | 0.845                       | 0.104                        | 0.436                 |
| QV15         | 16                          | 5.323                       | 0.467                       | 0.748                       | 0.733      | 0.576                       | 0.709                       | 0.185                        | 0.450                 |
| QV16         | 6                           | 2.483                       | 0.389                       | 0.519                       | 0.486      | 0.286                       | 0.390                       | 0.253                        | 0.375                 |
| QV17         | 7                           | 3.412                       | 0.707                       | 0.645                       | 0.576      | 0.618                       | 0.647                       | 0.047                        | 0.122                 |
| Mean         | 11.7                        | 4.847                       | 0.348                       | 0.774                       | 0.749      | 0.561                       | 0.727                       | 0.232                        | 0.529                 |

*N<sub>a</sub>*, number of alleles; *A<sub>R</sub>*, allelic richness; *H<sub>O</sub>*, observed heterozygosity over all populations; PIC, polymorphic information content; *H<sub>E</sub>*, expected heterozygosity over all populations; *H<sub>S</sub>*, mean genetic diversity within populations; *H<sub>T</sub>*, total genetic diversity; *F<sub>ST</sub>*, differentiation among-population; *G'\_{ST}* standardized genetic differentiation.

**Table S7.** Diversity indices of 16 EST-SSR loci for three related species

| Locus | $N_a$ |     |     | $N$   |       |      | $H_o$ |       |       | $H_E$ |       |       | PIC   |       |        | $F_{ST}$ |       |       |
|-------|-------|-----|-----|-------|-------|------|-------|-------|-------|-------|-------|-------|-------|-------|--------|----------|-------|-------|
|       | QV    | QA  | QC  | QV    | QA    | QC   | QV    | QA    | QC    | QV    | QA    | QC    | QV    | QA    | QC     | QV       | QA    | QC    |
| QV1   | 8     | 10  | 10  | 336   | 338   | 85   | 0.193 | 0.456 | 0.824 | 0.831 | 0.827 | 0.840 | 0.810 | 0.803 | 0.816  | 0.127    | 0.149 | 0.044 |
| QV2   | 11    | 12  | 3   | 336   | 338   | 85   | 0.253 | 0.320 | 0.560 | 0.789 | 0.427 | 0.607 | 0.761 | 0.416 | 0.587  | 0.154    | 0.400 | 0.089 |
| QV3   | 7     | 12  | 16  | 334   | 338   | 84   | 0.269 | 0.595 | 0.774 | 0.521 | 0.870 | 0.934 | 0.503 | 0.855 | 0.924  | 0.107    | 0.132 | 0.070 |
| QV4   | 4     | 5   | 7   | 319   | 338   | 85   | 0.187 | 0.285 | 0.494 | 0.576 | 0.716 | 0.808 | 0.535 | 0.666 | 0.780  | 0.304    | 0.352 | 0.069 |
| QV6   | 3     | 5   | 7   | 323   | 332   | 85   | 0.158 | 0.208 | 0.482 | 0.345 | 0.704 | 0.838 | 0.329 | 0.656 | 0.813  | 0.193    | 0.516 | 0.060 |
| QV7   | 7     | 7   | 4   | 326   | 336   | 85   | 0.202 | 0.516 | 0.471 | 0.750 | 0.647 | 0.606 | 0.720 | 0.611 | 0.565  | 0.129    | 0.183 | 0.161 |
| QV8   | 4     | 6   | 3   | 332   | 331   | 84   | 0.159 | 0.546 | 0.500 | 0.581 | 0.773 | 0.568 | 0.534 | 0.739 | 0.543  | 0.110    | 0.172 | 0.076 |
| QV9   | 21    | 22  | 10  | 310   | 323   | 79   | 0.145 | 0.325 | 0.519 | 0.916 | 0.934 | 0.836 | 0.909 | 0.928 | 0.816  | 0.137    | 0.153 | 0.098 |
| QV10  | 12    | 12  | 8   | 330   | 338   | 85   | 0.155 | 0.219 | 0.518 | 0.858 | 0.753 | 0.863 | 0.845 | 0.726 | 0.844  | 0.129    | 0.224 | 0.067 |
| QV11  | 6     | 7   | 10  | 336   | 338   | 85   | 0.144 | 0.216 | 0.682 | 0.653 | 0.698 | 0.896 | 0.614 | 0.648 | 0.881  | 0.099    | 0.281 | 0.061 |
| QV12  | 9     | 9   | 10  | 328   | 338   | 85   | 0.162 | 0.222 | 0.800 | 0.655 | 0.664 | 0.879 | 0.625 | 0.606 | 0.863  | 0.131    | 0.305 | 0.064 |
| QV13  | 8     | 10  | 6   | 334   | 337   | 85   | 0.168 | 0.213 | 0.718 | 0.832 | 0.562 | 0.822 | 0.811 | 0.548 | 0.796  | 0.127    | 0.329 | 0.074 |
| QV14  | 15    | 12  | 10  | 331   | 325   | 85   | 0.245 | 0.400 | 0.671 | 0.907 | 0.818 | 0.831 | 0.898 | 0.794 | 0.808  | 0.093    | 0.186 | 0.091 |
| Qv15  | 14    | 12  | 13  | 326   | 338   | 85   | 0.531 | 0.308 | 0.859 | 0.871 | 0.457 | 0.859 | 0.859 | 0.443 | 0.839  | 0.109    | 0.241 | 0.032 |
| QV16  | 3     | 5   | 2   | 322   | 338   | 85   | 0.512 | 0.251 | 0.471 | 0.599 | 0.382 | 0.409 | 0.526 | 0.368 | 0.0385 | 0.040    | 0.465 | 0.020 |
| QV17  | 4     | 6   | 6   | 322   | 337   | 85   | 0.671 | 0.822 | 0.244 | 0.675 | 0.593 | 0.677 | 0.613 | 0.507 | 0.625  | 0.071    | 0.043 | 0.082 |
| Mean  | 8.5   | 9.5 | 7.8 | 327.8 | 335.2 | 84.5 | 0.260 | 0.369 | 0.599 | 0.710 | 0.677 | 0.767 | 0.681 | 0.645 | 0.743  | 0.122    | 0.258 | 0.072 |

QV, *Q. variabilis*; QA, *Q. acutissima*; QC, *Q. chenii*.  $N_a$ : number of alleles;  $N$ , sample numbers;  $H_o$ , observed heterozygosity;  $H_E$ , expected heterozygosity; PIC, polymorphic information content;  $F_{ST}$ , among-population differentiation

**Table S8** Hardy-Weinberg equilibrium (HWE) test in this study

|                      | QV1    | QV2    | QV3    | QV4    | QV6    | QV7    | QV8    | QV9    |
|----------------------|--------|--------|--------|--------|--------|--------|--------|--------|
| <i>Q. variabilis</i> |        |        |        |        |        |        |        |        |
| SPX                  | 0.0000 | 0.0000 | 0.0003 | 0.0000 | NA     | 0.0000 | 0.0000 | 0.0000 |
| SPY                  | 0.0000 | 0.0000 | 0.0023 | 0.0872 | 0.0000 | 0.0000 | 0.0001 | 0.0000 |
| SPW                  | 0.0000 | 0.0000 | 0.0001 | 0.0819 | NA     | 0.0000 | 0.0000 | 0.0000 |
| SPU                  | 0.0000 | 0.0000 | 0.8830 | 0.0002 | 0.0029 | 0.0000 | 0.0002 | 0.0000 |
| SPE                  | 0.0000 | 0.0000 | 0.0011 | 0.0001 | NA     | 0.0012 | 0.0003 | 0.0000 |
| SPg                  | 0.0000 | 0.4944 | 0.0002 | 0.0000 | 0.0021 | 0.0000 | 0.0000 | 0.0000 |
| SPC                  | 0.0000 | 0.0009 | 0.0001 | 0.0252 | 0.6870 | 0.0002 | 0.0005 | 0.0018 |
| SPS                  | 0.0001 | 0.0041 | 0.3682 | 0.0008 | NA     | 0.0135 | 0.0014 | 0.0100 |
| SPI                  | 0.0000 | 0.0003 | 0.7604 | 0.0000 | 0.0000 | 0.0002 | 0.0000 | 0.0002 |
| SPF                  | 0.0715 | 0.0029 | 0.0031 | 0.0002 | NA     | 0.0027 | 0.0001 | 0.0012 |
| SPM                  | 0.0000 | 0.9865 | 0.6597 | 0.0000 | 0.0002 | 0.0000 | 0.0000 | 0.0021 |
| SPR                  | 0.0000 | 0.1837 | 0.0042 | 0.0000 | 0.0004 | 0.0000 | 0.0000 | 0.0012 |
| SPA                  | 0.0000 | 0.0000 | 0.0000 | 0.0000 | NA     | 0.0000 | 0.0000 | 0.0000 |
| SPJ                  | 0.0000 | 0.0000 | 0.0002 | 0.0266 | NA     | 0.0000 | 0.0000 | 0.0000 |
| SPV                  | 0.0000 | 0.0000 | 0.0000 | 1.0000 | NA     | 0.0000 | 0.0000 | 0.0000 |
| SPH                  | 0.0000 | 0.0001 | 0.0011 | 0.0000 | 0.0044 | 0.0355 | 0.0044 | 0.0000 |
| SPLD                 | 0.0000 | 0.0000 | 0.0029 | 0.0001 | NA     | 0.0000 | 0.0002 | 0.0000 |
| SPWS                 | 0.0000 | 0.0000 | 0.1702 | 0.0000 | 0.0029 | 0.0000 | 0.0000 | 0.0002 |
| SPc                  | 0.0000 | 0.0000 | 0.0002 | 0.0000 | NA     | 0.0000 | 0.0000 | 0.0000 |
| <i>Q. acutissima</i> |        |        |        |        |        |        |        |        |
| A                    | 0.0043 | 1.0000 | 0.0000 | 0.0007 | NA     | 0.7386 | 0.0465 | 0.0014 |
| B                    | 0.0000 | 0.6870 | 0.1220 | 0.0252 | 0.0000 | 0.0027 | 0.9010 | 0.0000 |

|                  |        |        |        |        |        |        |         |        |
|------------------|--------|--------|--------|--------|--------|--------|---------|--------|
| C                | 0.0372 | 0.8284 | 0.3970 | 0.0471 | NA     | 0.3333 | 0.2933  | 0.0469 |
| E                | 0.0178 | NA     | 0.5274 | 0.8476 | 0.0000 | 0.8570 | 0.2807  | 0.0000 |
| SR               | 0.2955 | 0.0834 | 0.1933 | 0.0082 | 0.0000 | 0.0003 | 0.0002  | 0.0908 |
| J                | 0.0005 | 1.0000 | 0.1385 | 0.0000 | 0.0000 | 0.7661 | 0.6773  | 0.0663 |
| LY               | 0.7514 | 1.0000 | 0.0294 | 0.0000 | 0.0000 | 0.1978 | 0.1003  | 0.0000 |
| HF               | 0.0217 | 0.0054 | 0.0063 | 0.0000 | 0.0000 | 0.0030 | 0.0042  | 0.0534 |
| XY               | 0.2308 | 0.4962 | 0.0175 | 0.0000 | 0.0000 | 0.2901 | 0.0013  | 0.0000 |
| CS               | 0.0023 | 0.9904 | 0.0559 | 0.1540 | 0.0000 | 0.1901 | 0.2078  | 0.0029 |
| CY               | 0.0042 | 0.0725 | 0.4096 | NA     | 0.0030 | 0.4456 | 0.00351 | 0.0172 |
| QS               | 0.0020 | 0.9968 | 0.2791 | 0.0000 | 0.0000 | 0.6642 | 0.6331  | 0.0208 |
| P                | 0.0873 | 0.1557 | 0.1209 | 0.0004 | 0.0000 | 0.8179 | 0.1265  | 0.7277 |
| T                | 0.0059 | 1.0000 | 0.0987 | 0.0000 | NA     | 0.9282 | 0.3277  | 0.0000 |
| U                | 0.0000 | 0.9968 | 0.1204 | 0.0023 | NA     | 0.9499 | 0.5136  | 0.0001 |
| YS               | 0.0032 | NA     | 0.1684 | NA     | NA     | 0.8161 | 0.6404  | 0.0063 |
| YK               | 0.5147 | 0.0232 | 0.0063 | 0.0002 | 0.0023 | 0.0000 | 0.0019  | 0.0002 |
| PS               | 0.1286 | 0.9998 | 0.2577 | 0.0000 | 0.0003 | 0.9785 | 0.0777  | 0.0343 |
| H                | 0.0000 | NA     | 0.0000 | 0.0000 | NA     | 0.3820 | 0.0005  | 0.0000 |
| L                | 0.0005 | 0.1726 | 0.4860 | 0.0000 | 0.0000 | 0.5256 | 0.0101  | 0.0206 |
| <i>Q. chenii</i> |        |        |        |        |        |        |         |        |
| XA               | 0.0808 | 0.3701 | 0.9059 | 0.0000 | 0.0000 | 0.0000 | 0.0000  | 0.0000 |
| XB               | 0.3395 | 0.1207 | 0.0867 | 0.0000 | 0.0004 | 0.0004 | 0.0000  | 0.0017 |
| XC               | 0.0025 | 0.0764 | 0.4589 | 0.0000 | 0.0000 | 0.0000 | 0.0148  | 0.0000 |
| XD               | 0.1243 | 0.7814 | 0.7313 | 0.0000 | 0.0000 | 0.0000 | 0.1277  | 0.0161 |
| XE               | 0.9803 | 0.1764 | 0.7982 | 0.0000 | 0.0000 | NA     | NA      | 0.0001 |

|                      | QV10   | QV11   | QV12   | QV13   | QV14   | QV15   | QV16   | QV17   |
|----------------------|--------|--------|--------|--------|--------|--------|--------|--------|
| <i>Q. variabilis</i> |        |        |        |        |        |        |        |        |
| SPX                  | 0.0000 | 0.0000 | 0.0000 | 0.0000 | 0.0000 | 0.6408 | 0.1642 | 0.5195 |
| SPY                  | 0.0000 | 0.0000 | 0.0000 | 0.0000 | 0.0000 | 0.9882 | 0.0321 | 0.0643 |
| SPW                  | 0.0000 | 0.0000 | 0.0000 | 0.0000 | 0.0000 | 0.3404 | 0.0183 | 0.2981 |
| SPU                  | 0.0000 | 0.0000 | 0.0000 | 0.0000 | 0.5565 | 0.5483 | 0.6807 | 0.6964 |
| SPE                  | 0.0000 | 0.0000 | 0.0000 | 0.0000 | 0.0000 | 0.2944 | 0.2312 | 0.6798 |
| SPg                  | 0.0000 | 0.0000 | 0.0000 | 0.0000 | 0.3249 | 0.3716 | 0.1151 | 0.1953 |
| SPC                  | 0.0000 | 0.0000 | 0.0004 | 0.0000 | 0.0000 | 0.2899 | 0.5789 | 0.0874 |
| SPS                  | 0.0014 | 0.0014 | 0.0022 | 0.0002 | 0.0001 | 0.7101 | 0.1328 | 0.5255 |
| SPI                  | 0.0000 | 0.0000 | 0.0000 | 0.0000 | 0.0000 | 0.4820 | 0.3638 | 0.1783 |
| SPF                  | 0.0001 | 0.0001 | 0.0135 | 0.0005 | 0.0010 | 0.0146 | 0.5255 | 0.2850 |
| SPM                  | 0.0020 | 0.0001 | 0.0000 | 0.0000 | 0.0000 | 0.0140 | 0.6134 | 0.6725 |
| SPR                  | 0.0003 | 0.0000 | 0.0000 | 0.0000 | 0.0000 | 0.7024 | 0.2297 | 0.2843 |
| SPA                  | 0.0000 | 0.0000 | 0.0004 | 0.0004 | 0.0001 | 0.0528 | 0.8183 | 0.8465 |
| SPJ                  | 0.0000 | 0.0000 | 0.0000 | 0.0000 | 0.0000 | 0.1692 | 0.4759 | 0.2522 |
| SPV                  | 0.0000 | 0.0000 | 0.0000 | 0.0000 | 0.0000 | 0.0015 | 0.5135 | 0.5475 |
| SPH                  | 0.0009 | 0.0000 | 0.0000 | 0.0011 | 0.0924 | 0.0047 | 0.3860 | 0.9539 |
| SPLD                 | 0.0000 | 0.0000 | 0.0089 | 0.0000 | 0.0000 | 0.2807 | 0.8406 | 0.6905 |
| SPWS                 | 0.0000 | 0.0000 | 0.0277 | 0.0000 | 0.0417 | 0.2034 | 0.1368 | 0.5893 |
| SPc                  | 0.0258 | 0.0000 | 0.0000 | 0.0000 | 0.4684 | 0.0065 | 0.4255 | 0.2458 |
| <i>Q. acutissima</i> |        |        |        |        |        |        |        |        |
| A                    | 0.0001 | 0.0014 | 0.0050 | 0.0050 | 0.0008 | NA     | NA     | 0.0050 |
| B                    | 0.0000 | 0.0000 | 0.0000 | 0.0003 | 0.0005 | 0.0007 | NA     | 0.0000 |
| C                    | 0.0000 | 0.0000 | 0.0000 | 0.0003 | 0.0001 | 0.0273 | NA     | 0.0000 |
| E                    | 0.0000 | 0.0000 | 0.0001 | 0.0002 | 0.0000 | 0.0010 | NA     | 0.0053 |

|                  |        |        |        |        |        |        |        |        |
|------------------|--------|--------|--------|--------|--------|--------|--------|--------|
| SR               | 0.0037 | 0.0001 | 0.0000 | 0.0008 | 0.0018 | 0.0072 | NA     | 0.0040 |
| J                | 0.0000 | 0.0000 | 0.0023 | NA     | 0.0000 | 1.0000 | NA     | 0.0000 |
| LY               | 0.0000 | 0.0000 | 0.0000 | 0.0023 | 0.0000 | 0.0252 | NA     | 0.0016 |
| HF               | 0.0000 | 0.0000 | 0.0000 | NA     | 0.0001 | 1.0000 | NA     | 0.0000 |
| XY               | 0.0000 | 0.0000 | 0.0000 | 0.0000 | 0.0001 | 0.0005 | 0.0023 | 0.0068 |
| CS               | 0.0050 | 0.0001 | 0.0003 | 0.0050 | 0.0017 | NA     | NA     | 0.0233 |
| CY               | 0.0091 | 0.0040 | 0.0021 | 0.0637 | 0.3063 | 0.0030 | NA     | 0.0070 |
| QS               | 0.0000 | 0.0000 | 0.0000 | NA     | 0.0000 | 0.1560 | NA     | 0.0000 |
| P                | 0.0000 | 0.0000 | 0.0000 | 0.0000 | 0.0112 | NA     | NA     | 0.2004 |
| T                | 0.0000 | 0.0000 | 0.0000 | 0.0001 | 0.0012 | 0.0027 | 0.0001 | 0.0101 |
| U                | 0.0000 | 0.0002 | 0.0001 | 0.0000 | 0.5934 | 0.8185 | 0.2133 | 0.1562 |
| YS               | 0.0050 | 0.0001 | 0.0003 | 0.0001 | 0.2098 | 0.1405 | 0.0000 | 0.6537 |
| YK               | 0.0000 | 0.0000 | 0.0041 | 0.0000 | 0.0440 | 0.1446 | 0.0000 | 0.0283 |
| PS               | 0.0085 | 0.1963 | 0.0455 | 0.0003 | 0.4840 | 0.4765 | 0.3572 | 0.9088 |
| H                | 0.0000 | 0.0000 | 0.0001 | 0.0000 | 0.0013 | 0.0320 | NA     | 0.0948 |
| L                | 0.0000 | 0.0023 | 0.0000 | 0.0000 | 0.0000 | 0.0740 | 0.0131 | 0.8183 |
| <i>Q. chenii</i> |        |        |        |        |        |        |        |        |
| XA               | 0.0000 | 0.0013 | 0.6621 | 0.0110 | 0.0035 | 0.9456 | 1.0000 | 0.0508 |
| XB               | 0.0012 | 0.0128 | 0.1320 | 0.0868 | 0.0011 | 0.9228 | NA     | 0.0050 |
| XC               | 0.0000 | 0.3480 | 0.1664 | 0.3878 | 0.0006 | 0.1728 | NA     | 0.0000 |
| XD               | 0.0004 | 0.0024 | 0.0317 | 0.4319 | 0.5984 | 0.0298 | NA     | 0.0066 |
| XE               | 0.0000 | 0.0239 | 0.0102 | 0.0008 | 0.0563 | 0.1530 | NA     | 0.4498 |

**Table S9.** Estimation of rates of contemporary gene flow per generation among three species (QV, QA and QC) using the programs BAYESASS v3.0

|                      | <i>Q. variabilis</i> → | <i>Q. acutissima</i> → | <i>Q. chenii</i> → |
|----------------------|------------------------|------------------------|--------------------|
| <i>Q. variabilis</i> | -                      | 0.001                  | 0.004              |
| <i>Q. acutissima</i> | 0.002                  | -                      | 0.004              |
| <i>Q. chenii</i>     | 0.001                  | 0.024                  | -                  |

QV, *Q. variabilis*; QA, *Q. acutissima*; QC, *Q. chenii*. →, source populations.

**Table S10.** Posterior probability of each scenario and 95% confidence intervals (CI) based on the logistic regression approach for approximate Bayesian computation analyses (ABC) for all three related species (*Q. acutissima*, *Q. variabilis* and *Q. chenii*). Type I and type II errors for the best supported scenario (in bold) are indicated

| Scenario | Posterior probability | 95% CI          | Type I error | Type II error |
|----------|-----------------------|-----------------|--------------|---------------|
| 1        | 0.1645                | [0.1057,0.2232] |              |               |
| 2        | 0.4747                | [0.4128,0.5366] | 0.160        | 0.130         |
| 3        | 0.0664                | [0.0074,0.1254] |              |               |
| 4        | 0.2944                | [0.2225,0.3664] |              |               |

**Table S11.** Indices of bottleneck test of the three related species

| ID( <i>Q. variabilis</i> ) |             | One-tail Wilcoxon test |       | ID( <i>Q. acutissima</i> ) |             | One-tail Wilcoxon test |       | ID( <i>Q. chenii</i> ) |             | One-tail Wilcoxon test |       |
|----------------------------|-------------|------------------------|-------|----------------------------|-------------|------------------------|-------|------------------------|-------------|------------------------|-------|
|                            | Model-shift | TPM                    | SMM   |                            | Model-shift | TPM                    | SMM   |                        | Model-shift | TPM                    | SMM   |
| SPX                        | L-shaped    | 0.021                  | 0.084 | A                          | Shift mode  | 0.936                  | 0.936 | XA                     | L-shaped    | 0.798                  | 0.894 |
| SPY                        | L-shaped    | 0.316                  | 0.490 | B                          | L-shaped    | 0.992                  | 0.999 | XB                     | L-shaped    | 0.381                  | 0.661 |
| SPW                        | L-shaped    | 0.467                  | 0.835 | C                          | L-shaped    | 0.954                  | 0.966 | XC                     | L-shaped    | 0.423                  | 0.661 |
| SPU                        | L-shaped    | 0.080                  | 0.232 | E                          | L-shaped    | 0.914                  | 0.966 | XD                     | L-shaped    | 0.211                  | 0.319 |
| SPE                        | L-shaped    | 0.533                  | 0.640 | SR                         | L-shaped    | 0.805                  | 0.874 | XE                     | Shift mode  | 0.040                  | 0.122 |
| SPg                        | L-shaped    | 0.490                  | 0.684 | J                          | L-shaped    | 0.148                  | 0.213 |                        |             |                        |       |
| SPC                        | L-shaped    | 0.752                  | 0.874 | LY                         | L-shaped    | 0.985                  | 0.994 |                        |             |                        |       |
| SPS                        | Shift mode  | 0.577                  | 0.719 | HF                         | L-shaped    | 0.271                  | 0.428 |                        |             |                        |       |
| SPI                        | L-shaped    | 0.647                  | 0.752 | XY                         | L-shaped    | 0.666                  | 0.826 |                        |             |                        |       |
| SPF                        | Shift mode  | 0.004                  | 0.008 | CS                         | Shift mode  | 0.163                  | 0.251 |                        |             |                        |       |
| SPM                        | L-shaped    | 0.353                  | 0.490 | CY                         | Shift mode  | 0.000                  | 0.001 |                        |             |                        |       |
| SPR                        | L-shaped    | 0.783                  | 0.920 | QS                         | L-shaped    | 0.476                  | 0.665 |                        |             |                        |       |
| SPA                        | Shift mode  | 0.300                  | 0.489 | P                          | L-shaped    | 0.251                  | 0.524 |                        |             |                        |       |
| SPJ                        | L-shaped    | 0.360                  | 0.756 | T                          | L-shaped    | 0.773                  | 0.849 |                        |             |                        |       |
| SPV                        | L-shaped    | 0.165                  | 0.360 | U                          | L-shaped    | 0.924                  | 0.964 |                        |             |                        |       |
| SPH                        | L-shaped    | 0.202                  | 0.232 | YS                         | Shift mode  | 0.040                  | 0.040 |                        |             |                        |       |
| SPLD                       | Shift mode  | 0.489                  | 0.756 | YK                         | L-shaped    | 0.942                  | 0.975 |                        |             |                        |       |
| SPWS                       | L-shaped    | 0.372                  | 0.470 | PS                         | L-shaped    | 0.935                  | 0.971 |                        |             |                        |       |
| SPc                        | L-shaped    | 0.126                  | 0.180 | H                          | L-shaped    | 0.271                  | 9.318 |                        |             |                        |       |
|                            |             |                        |       | L                          | L-shaped    | 0.736                  | 0.863 |                        |             |                        |       |

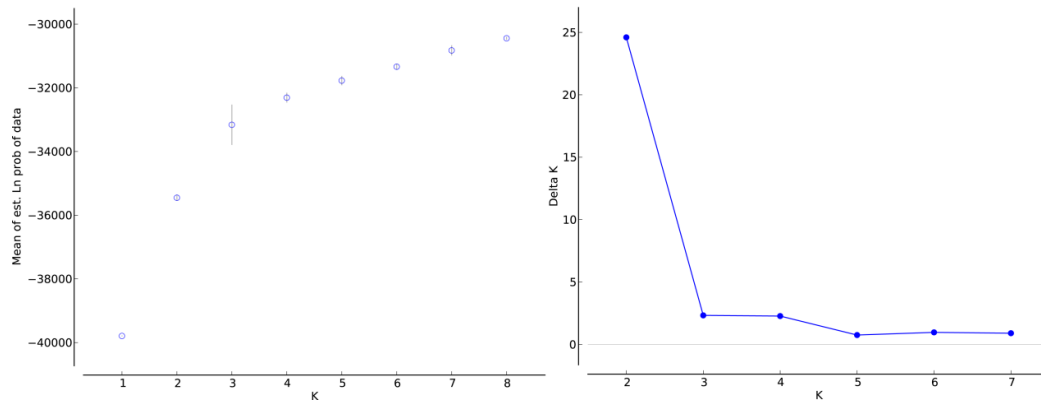

**Figure S1.** Bayesian inference analysis of 16 EST-SSR data determining the most likely number of clusters ( $K$ ) for three *Cerris* oaks (*Q. variabilis*, *Q. acutissima* and *Q. chenii*). The distribution of the likelihood  $L(K)$  values (a) and Delta $K$  values (b) are presented for  $K = 1-8$  (10 replicates).

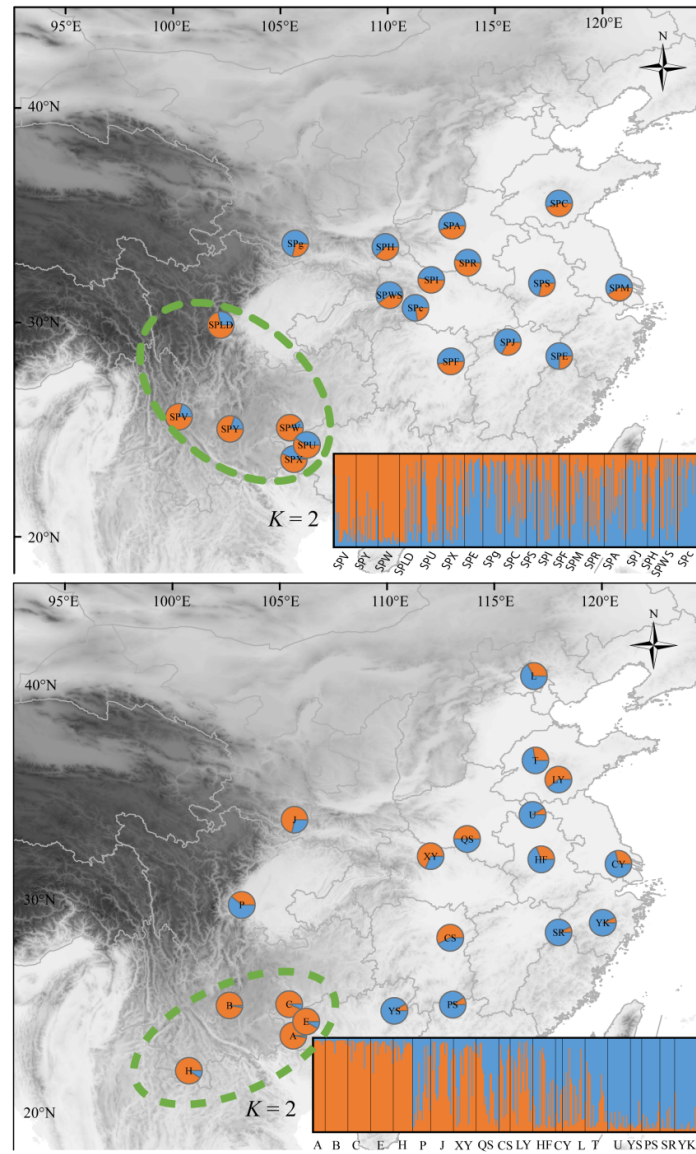

**Figure S2.** Bayesian inference analysis of nuclear data for *Q. variabilis* and *Q. acutissima* separately, STRUCTURE plots are presented for  $K = 2$ .

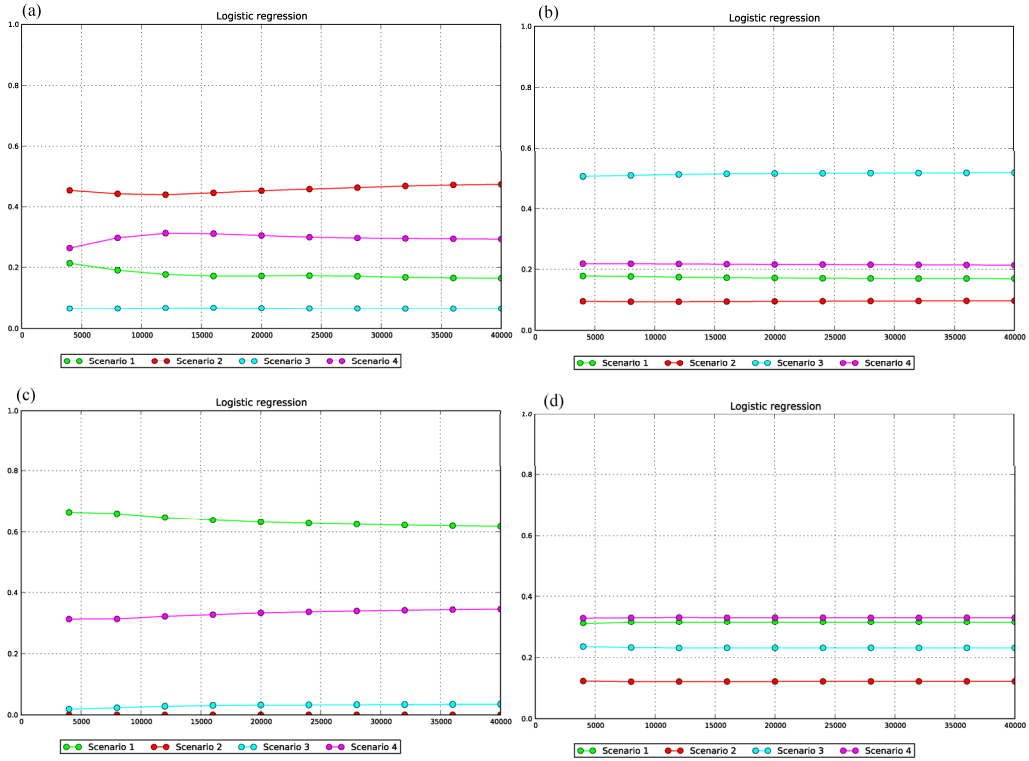

**Figure S3.** Comparison of posterior probabilities for four simulated scenarios of species differentiation obtained by logistic regression from 1 % of the closest data set in DIYABC.

(a), comparison of posterior probabilities for four simulated scenarios of three oak species (*Q. variabilis* (b); *Q. acutissima* (c) and *Q. chenii* (d)) demographic history obtained by logistic regression from 1 % of the closest data set in DIYABC.

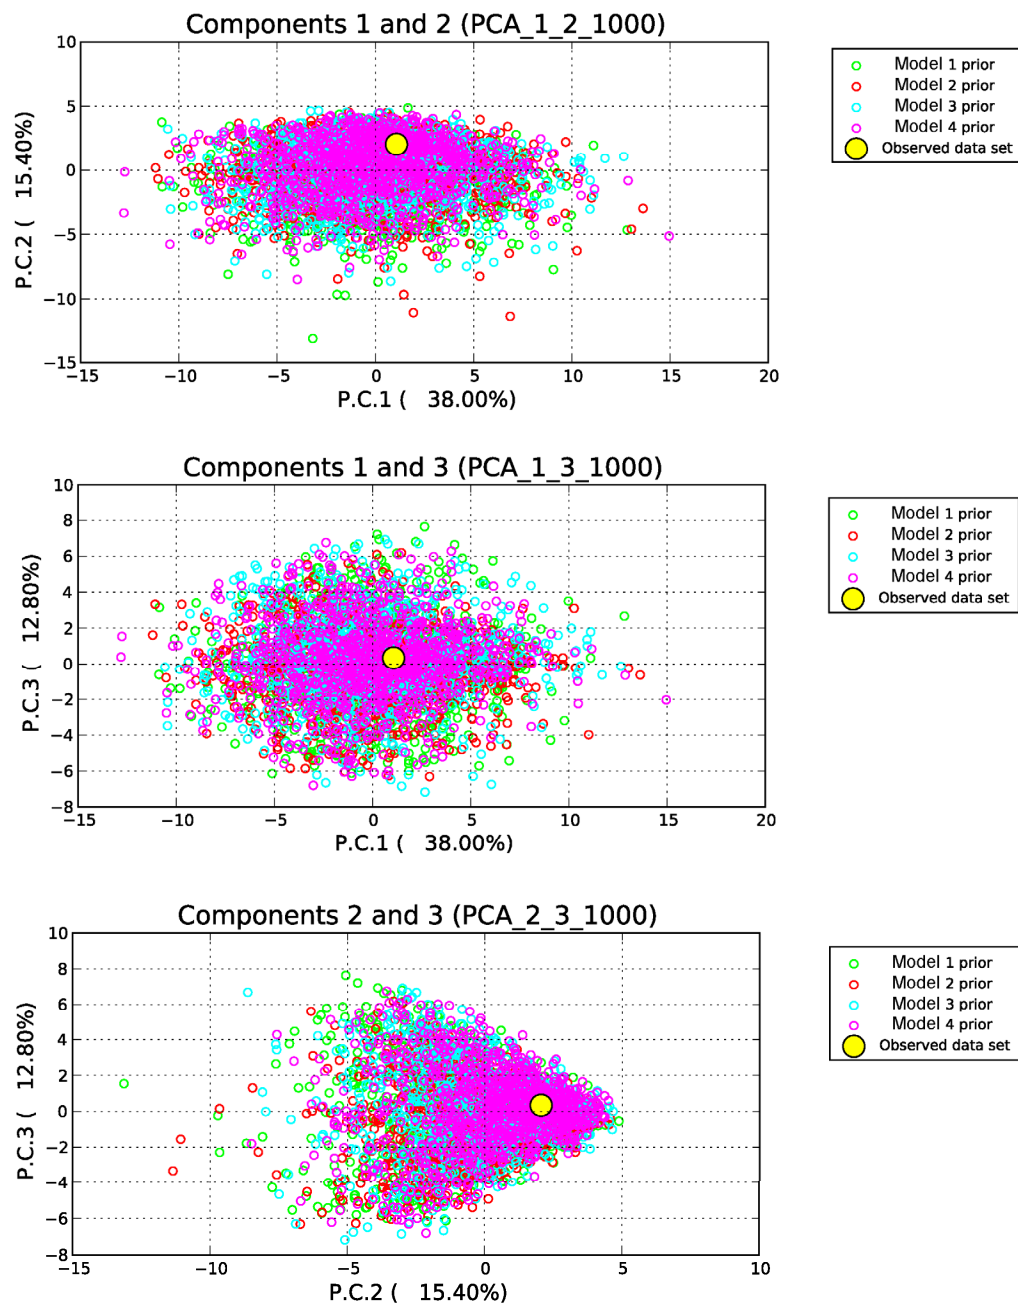

**Figure S4.** Principal component analysis results obtained along the first three axes for the pre-evaluate models and prior distributions of three oak species divergence in DIYABC.

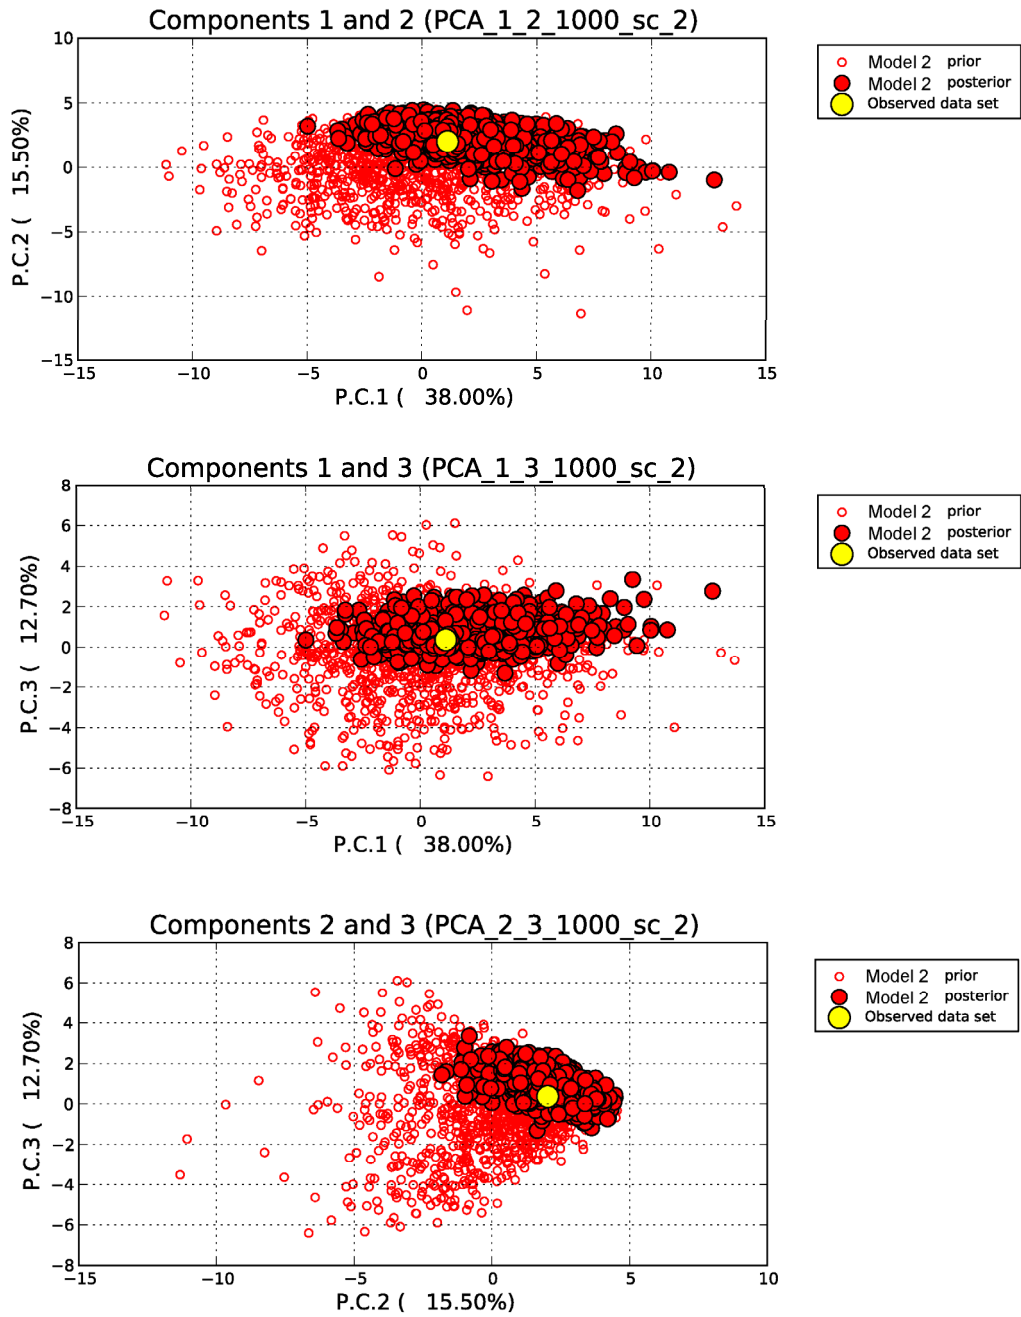

**Figure S5.** Model checking in DIYABC for the best-supported (species divergence: model 2).

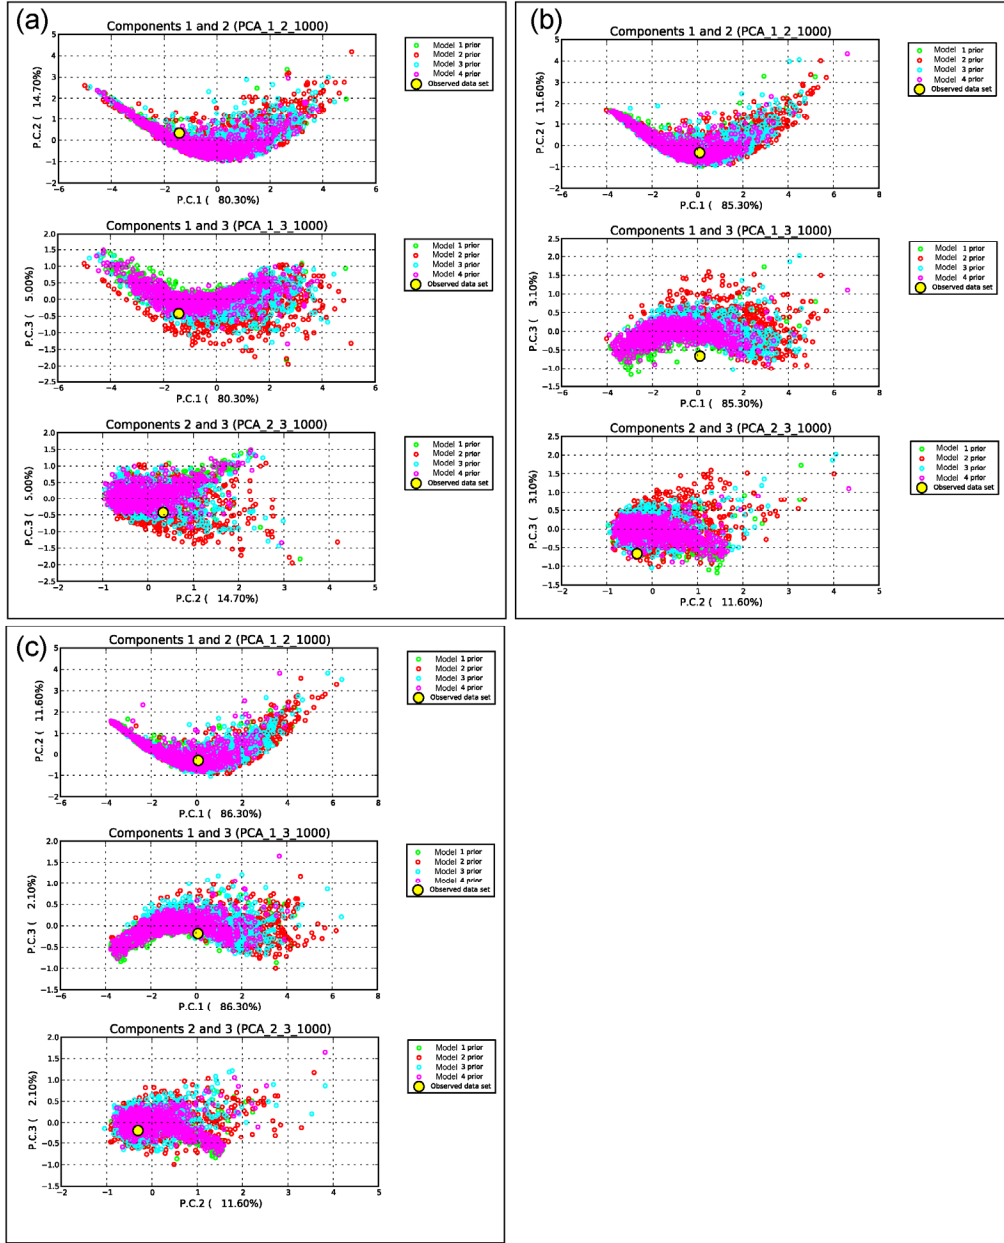

**Figure S6.** Principal component analysis results obtained along the first three axes for the pre-evaluate models and prior distributions of three oak species demographic models in DIYABC. (a), (b) and (c) representing the species of *Q. variabilis*, *Q. acutissima*, and *Q. chenii*, respectively.

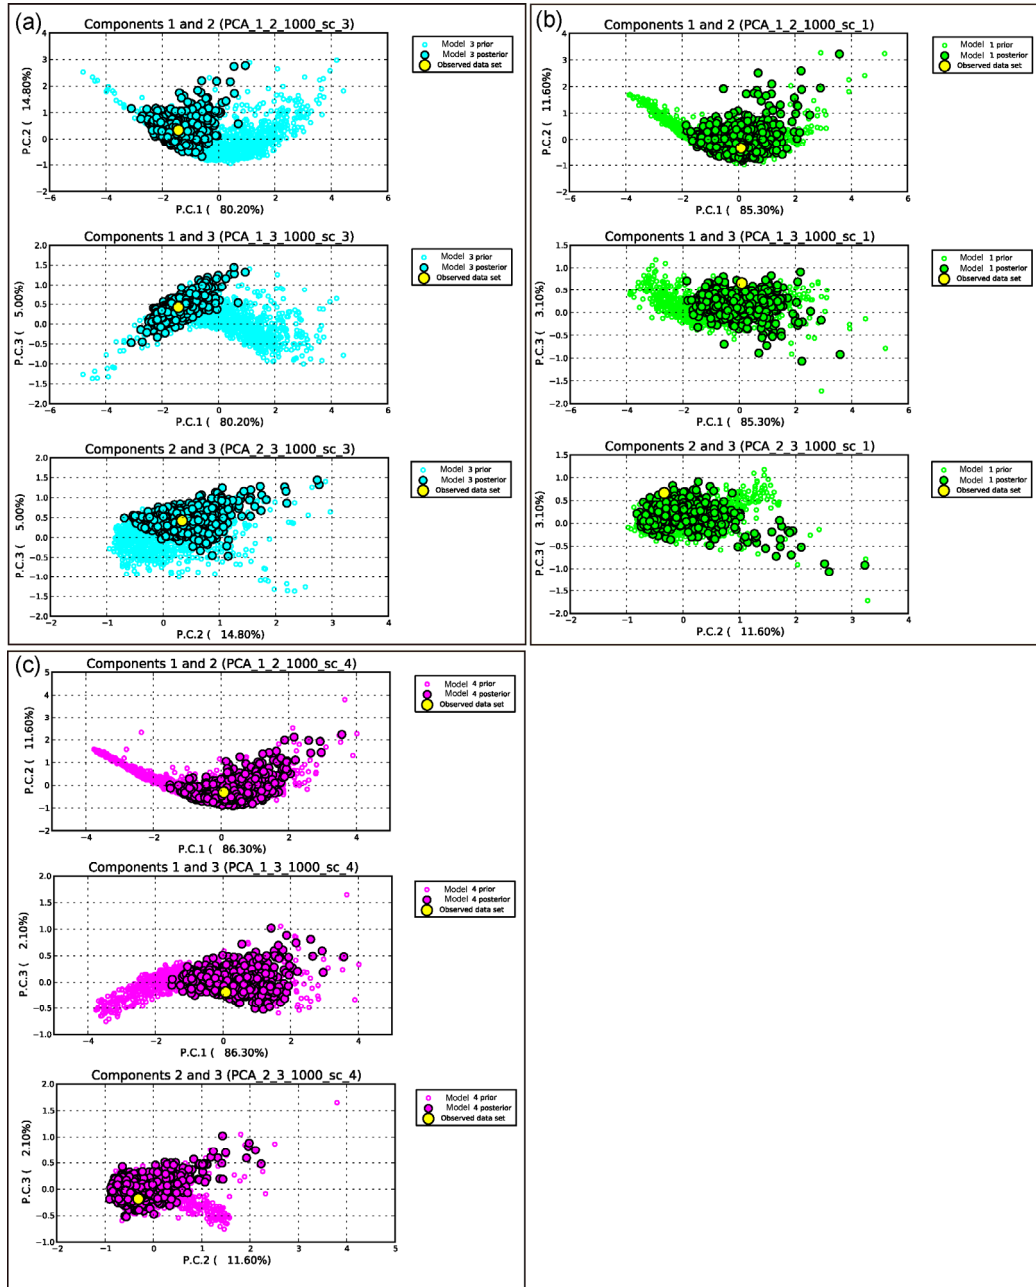

**Figure S7.** Model checking in DIYABC for the best-supported demographic models. (a), (b) and (c) representing the species of *Q. variabilis* (Model 3), *Q. acutissima* (Model 1), and *Q. chenii* (Model 4), respectively.

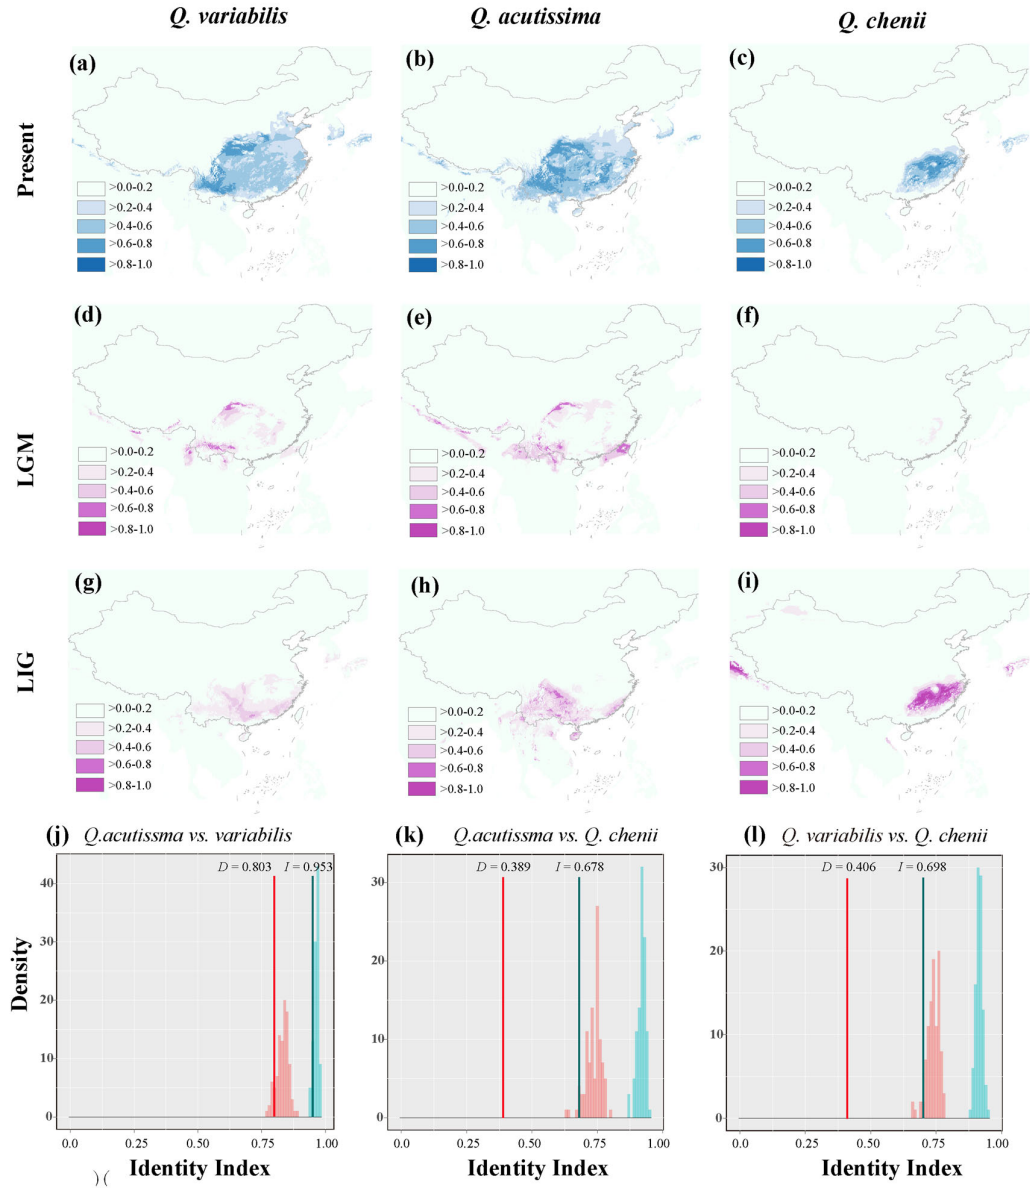

**Figure S8.** Predicted distributions of *Q. variabilis* (a, d, j), *Q. chenii* (b, e, h) and *Q. acutissima* (c, f, i) based on ecological niche modelling using Maxent. Predicted distributions are shown for the present time (a, b, c), LGM (d, e, f), and LIG distribution (g, h, i). The results of identity tests (j-l). Bar indicate the null distributions of  $D$  and  $I$ . Both are generated from 100 randomizations. x-axis indicates values of  $I$  and  $D$  and y-axis indicates number of randomizations. Red and green solid line indicates values in actual Maxent runs.



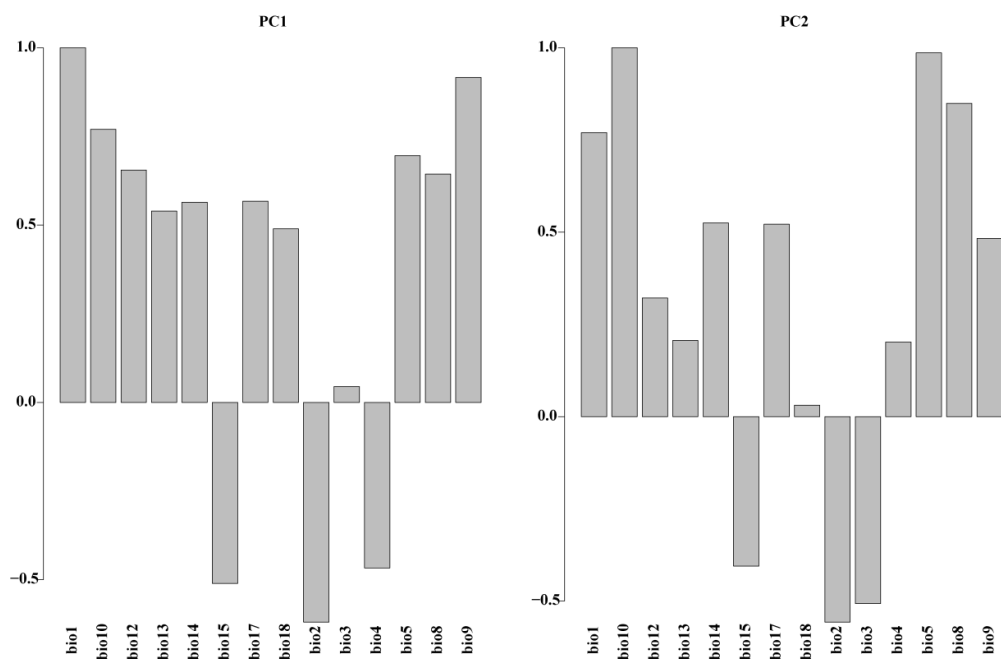

**Figure S10.** Contribution of each environmental variable to spatial distribution of the PCA-env.
